# Supplementary material for: Hydrophilic magnetic host–guest Ti–phenolic networks: a promising material for the highly sensitive enrichment of glycopeptides and phosphopeptides
Source: Royal Society of Chemistry journal article supplement (doi:10.1039/d2tb01708c), 2023-01-01
Supplement: d2tb01708c1.pdf [file d2tb01708c1.pdf]

---

**Hydrophilic magnetic host-guest Ti-phenolic networks: a promising material for highly sensitive enrichment of glycopeptides/phosphopeptides.**

Yuxuan Wang <sup>1a</sup>, Ping Li <sup>1a</sup>, Wenhui Xu <sup>a</sup>, Dawei Zhang <sup>a,\*</sup>, Qiong Jia <sup>a,b,\*</sup>

<sup>a</sup> College of Chemistry, Jilin University, Changchun 130012, China

<sup>b</sup> Key Laboratory for Molecular Enzymology and Engineering of Ministry of Education, College of Life Sciences, Jilin University, Changchun 130012, China

Email addresses: daweizhang9@163.com (D. Zhang) and jiaqiong@jlu.edu.cn (Q. Jia)

**Contents**

|                                      |       |
|--------------------------------------|-------|
| 1. Materials .....                   | SI-2  |
| 2. Instruments .....                 | SI-2  |
| 3. Sample Preparation .....          | SI-3  |
| 4. Quantitative Recovery Study ..... | SI-4  |
| 5. MS Analysis .....                 | SI-4  |
| 5. Figs. S1-S15 .....                | SI-6  |
| 6. Tables S1-S5 .....                | SI-13 |
| 7. References .....                  | SI-19 |

---

## 1. Materials

$\beta$ -cyclodextrin ( $\beta$ -CD), ferric chloride hexahydrate ( $\text{FeCl}_3 \cdot 6\text{H}_2\text{O}$ ), titanium sulfate ( $\text{Ti}(\text{SO}_4)_2$ ), zirconium chloride ( $\text{ZrCl}_4$ ), zinc chloride ( $\text{ZnCl}_2$ ), glutathione (GSH), 2,2'-azobis(2-methylpropionitrile) (AIBN), 1-adamantanecarboxylic acid (AdC), triethylamine (TEA), trifluoroacetic acid (TFA), formic acid (FA), sodium acetate anhydrous (NaAc), and dopamine hydrochloride ( $\text{DA} \cdot \text{HCl}$ ) were purchased from Aladdin Reagents (Shanghai, China). Acetonitrile (ACN), ethanol, methanol anhydrous, sodium sulfate anhydrous ( $\text{Na}_2\text{SO}_4$ ), ethylene glycol (EG), potassium carbonate ( $\text{K}_2\text{CO}_3$ ), allyl bromide, *n*-hexane, hydrochloric acid, ethyl acetate, and acetone were obtained from Beijing Chemical Works (Beijing, China). *N,N'*-carbonyldiimidazole (CDI), *N,N'*-dimethylformamide anhydrous (DMF), and dimethyl sulfoxide (DMSO) were bought from Energy Chemical (Shanghai, China). Immunoglobulin G (IgG), bovine serum albumin (BSA), 2,5-dihydroxybenzoic acid (DHB), dithiothreitol (DTT), iodoacetamide (IAA), triethyl ammonium bicarbonate (TEAB), deuterium oxide ( $\text{CD}_2\text{O}$ ), and trypsin from bovine pancreas were bought from Sigma-Aldrich (St. Louis, MO, USA). Human serum sample was obtained from China-Japan Hospital of Jilin University (Changchun, China) according to standard clinical procedures. Standard phosphopeptide with sequence of FQ(pSER)EEQQQTEDELQDK (2062 Da) was bought from GenScript company (Nanjing, China). Milli-Q water (typical resistivity of  $18.2 \text{ M}\Omega \text{ cm}^{-1}$ ) was obtained from an inline Millipore RiOs/Origin water purification system.

## 2. Instruments

Scanning electron microscopic (SEM) images were obtained using a JEOL-JSM-6360LV scanning electron microscope (JEOL, Japan). Transmission electron microscopic (TEM) images were acquired on a TECNAI F20 instrument (FEI, USA) with the accelerating voltage of 200 kV. Fourier-transform infrared (FT-IR) spectra were determined on a Thermo Nicolet 670 FT-IR instrument (Thermo Nicolet Corporation, USA) operating at the wavelength range of  $4000\text{-}500 \text{ cm}^{-1}$ . An X-ray

---

photoelectron spectrometer (XPS, Thermo Electron, USA) was used to obtain XPS data. The magnetic properties were determined by a vibrating sample magnetometer (VSM) on a Superconducting Quantum Interference Device (SQUID XL-7, Quantum Design, USA). The water contact angle was measured with an OCA20 apparatus (DataPhysics, Germany) at a saturated humidity with the temperature controlled by a superthermostat (Julabo F25, Germany).

### **3. Sample Preparation**

#### **3.1 Tryptic digestion of standard proteins.**

IgG (1 mg),  $\beta$ -casein (1 mg), and BSA (1 mg) were uniformly dispersed in  $\text{NH}_4\text{HCO}_3$  buffer (1 mL, 50 mM, pH = 8.5), respectively, and then, the mixtures were denatured by boiling for 10 min. Thereafter, the trypsin (enzyme/substrate = 1/40, *w/w*) was added into the above mixtures at 37 °C overnight.

#### **3.2 Tryptic digestion of human serum.**

Human serum (2  $\mu\text{L}$ ) was added into the above  $\text{NH}_4\text{HCO}_3$  buffer (20  $\mu\text{L}$ ) and incubated at room temperature for 1 h, and then centrifuged at 12000 rpm for 5 min. Subsequently, the supernatant was reduced with 5 mM DTT at 37 °C for 30 min and alkylated with 10 mM IAA at 25 °C in the dark for 30 min. Then, the mixtures were digested with trypsin (1/30, *w/w*) at 37 °C for 16 h.

#### **3.3 Tryptic digestion of HeLa cell lysate.**

HeLa cells (45 mg) were added into the mixed solution of RIPA (450  $\mu\text{L}$ ) and PMSF (4.5  $\mu\text{L}$ ), and the mixture was incubated at 0 °C for 10 min. After centrifuged at 10000 rpm for 10 min, the supernatant (25 mg) was added into 2500  $\mu\text{L}$  aqueous solution containing urea (6 M) and  $\text{NH}_4\text{HCO}_3$  (50 mM). The proteins extracted from HeLa cell lysate were reduced with 200 mM DTT at 56 °C for 1 h and alkylated with 200 mM IAA at 37 °C in the dark for 30 min. Subsequently, the mixture was digested with trypsin (1/40, *w/w*) at 37 °C for 16 h. Finally, all the protein trypsin digests were reserved at -80 °C for further enrichment experiments.

---

## 4. Quantitative Recovery Study

A standard phosphopeptide with sequence of FQ(pSER)EEQQQTEDELQDK (2062 Da) was analyzed. The standard phosphopeptide was labeled with the method of stable isotope dimethyl labeling according to previous works<sup>1 2</sup>. The standard peptide (0.1 mg) was dispersed into 100 mM TEAB (500  $\mu$ L), and then 100  $\mu$ L above solution was added into centrifugal tube in duplicate. CH<sub>2</sub>O (4%, v/v) and CD<sub>2</sub>O (4  $\mu$ L) were added into the above two tubes to conduct light and intermediate dimethyl labeling, respectively, and then the products were reduced with 0.6 M NaBH<sub>3</sub>CN (4  $\mu$ L) at 22 °C for 1 h. The reaction was stopped with 1% NH<sub>3</sub>·H<sub>2</sub>O (16  $\mu$ L) and 5% FA (8  $\mu$ L) at 0 °C.

Light dimethyl labeled samples (1  $\mu$ L) and intermediate dimethyl labeled samples (1  $\mu$ L) dispersed into H<sub>2</sub>O (5  $\mu$ L), and the above solution was analyzed by MALDI-TOF MS. The intensities of 2118 Da and 2126 Da are denoted as A<sub>1</sub> and B<sub>1</sub> respectively, and the intensity ratio of two peaks was denoted as C<sub>1</sub> (C<sub>1</sub>= A<sub>1</sub>/B<sub>1</sub>).

Light dimethyl labeled samples (1  $\mu$ L) was enriched with mTiCD@AG, and then all elute (5  $\mu$ L) was mixed with intermediate dimethyl labeled samples (1  $\mu$ L) followed by MALDI-TOF MS. The intensities of 2118 Da and 2126 Da were denoted as A<sub>2</sub> and B<sub>2</sub> respectively, and the intensity ratio of two peaks was denoted as C<sub>2</sub> (C<sub>2</sub>= A<sub>2</sub>/B<sub>2</sub>). Three parallel experiments were conducted, and the C<sub>2</sub> of phosphopeptide enrichment was average C<sub>2</sub> of three parallel experiments. The quantitative recovery for phosphopeptides was calculated with the formula  $R=(C_2/C_1)*100\%$ .

## 5. MS Analysis

0.5  $\mu$ L eluent was mixed with 0.5  $\mu$ L DHB (25 mg/mL in ACN/H<sub>2</sub>O/H<sub>3</sub>PO<sub>4</sub>, 70/29/1, v/v/v) on the MALDI plate and dried at room temperature. MALDI-TOF MS instrument (Autoflex speed TOF/TOF, Bruker Daltonik GmbH, Germany) was operated in the reflection positive-ion mode with the *m/z* scan range of 1000-3500 Da and the laser pulse rate of 500 Hz. All MS signals were analyzed with the flexAnalysis software.

---

The glycopeptides and phosphopeptides enriched from HeLa cell lysate were separated by Easy-nLC 1000. Buffer A was 0.1% FA-H<sub>2</sub>O (v/v) and B was 0.1% FA-84% ACN (v/v). After the chromatographic column was equilibrated with 95% Buffer A, the sample was loaded into the Trap column through an automatic sampler. After separated by chromatography, the peptides were analyzed by Q-Exactive mass spectrometry in the positive ion mode. The full-scan MS ranged from 300-1800 *m/z*. Resolution: 70000 at 200 *m/z*; Automatic gain control target: 1e<sup>6</sup>; Maximum IT: 50 ms; Number of scan ranges: 1; Dynamic exclusion: 30.0 s. Mass-to-charge ratio was collected as follows: 20 fragmentation patterns (MS2 scan) were acquired of after each full scan. Resolution: 17500 at 200 *m/z*; Activation SI-3 type: Higher energy collision induced dissociation (HCD); Normalized collision energy: 27 eV; Isolation window: 2 *m/z*; Microscans: 1; Maximum IT: 50 ms.

MS raw files were analyzed by search engine Mascot 2.2.2 with the Database of uniprot\_Homo\_sapiens\_207393\_20230103 for identifying phosphopeptides and glycopeptides from HeLa cell lysate.

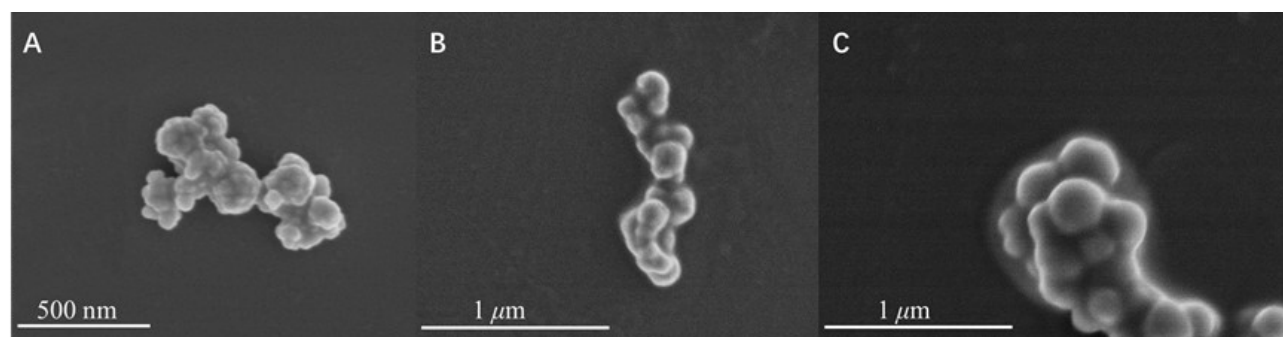

Fig. S1. SEM images of (A) MNPs, (B) mTiCD and (C) mTiCD@AG.

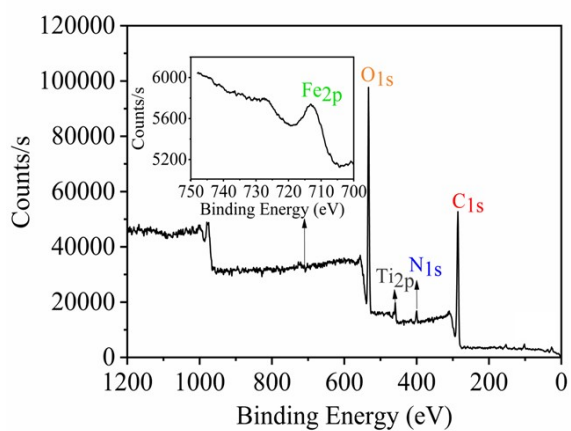

Fig. S2. XPS spectrum of mTiCD.

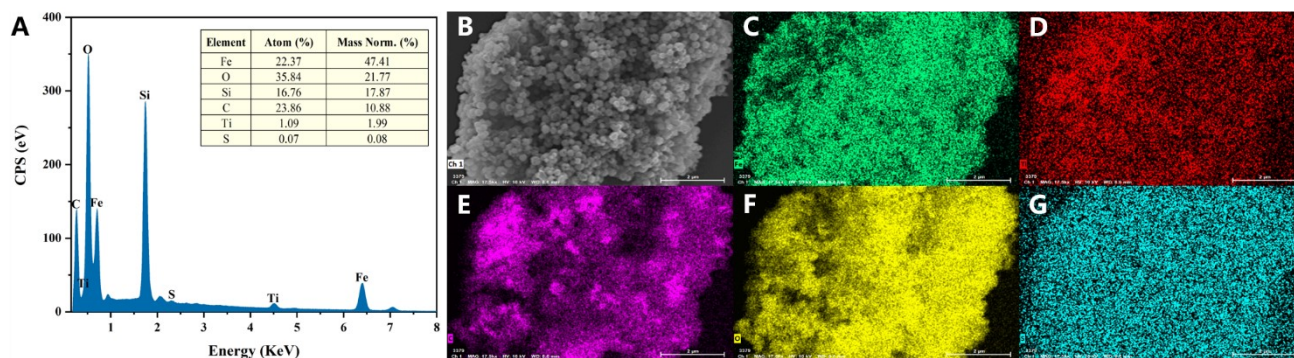

Fig. S3. (A) EDS spectrum of mTiCD@AG. (B) SEM image of mTiCD@AG and corresponding EDS element mapping of (C) Fe, (D) Ti, (E) C, (F) O and (G) S in mTiCD@AG.

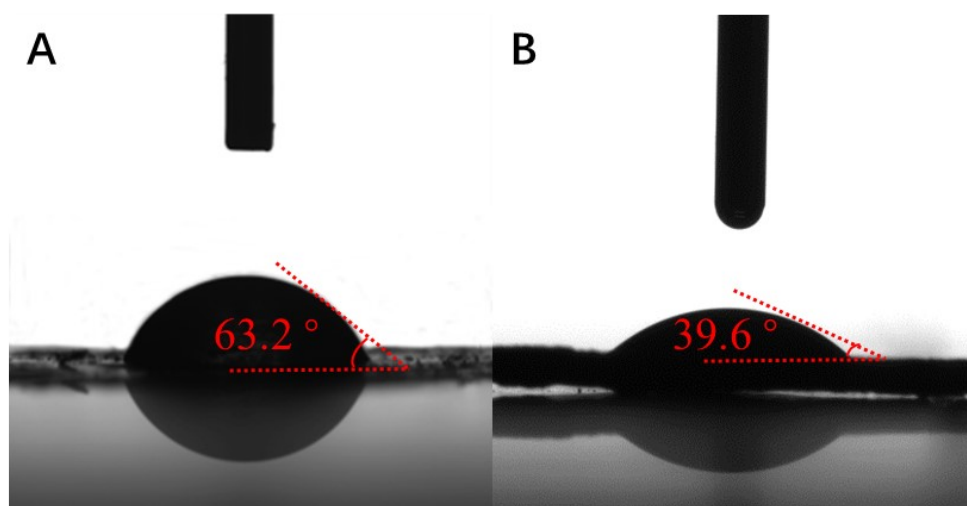

Fig. S4. Water contact angles of (A) mTiCD and (B) mTiCD@AG.

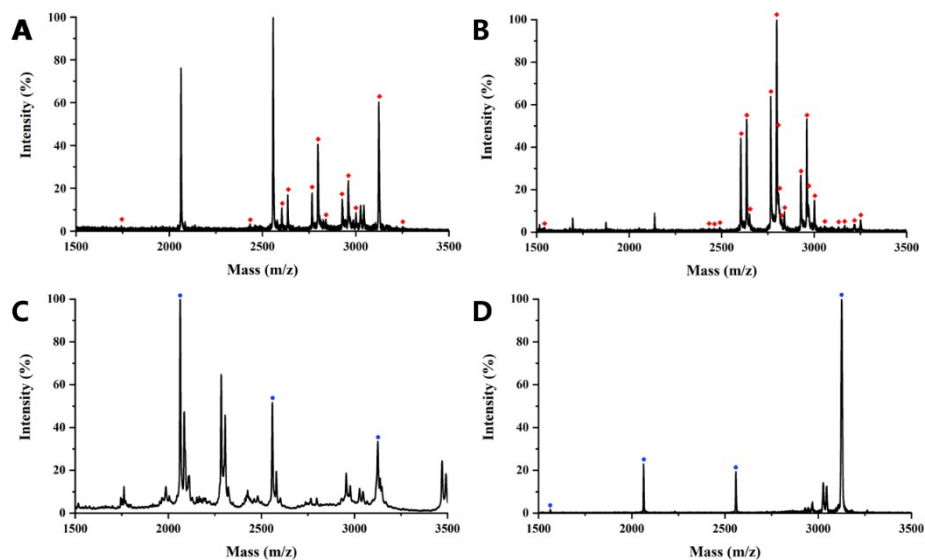

Fig. S5. MALDI-TOF MS analysis of (A-B) IgG digests and (C-D)  $\beta$ -casein digests: (A, C) after enrichment with  $\text{Fe}_3\text{O}_4$  and (B, D) after enrichment with mTiCD. “◆” and “●” represent glycopeptides and phosphopeptides.

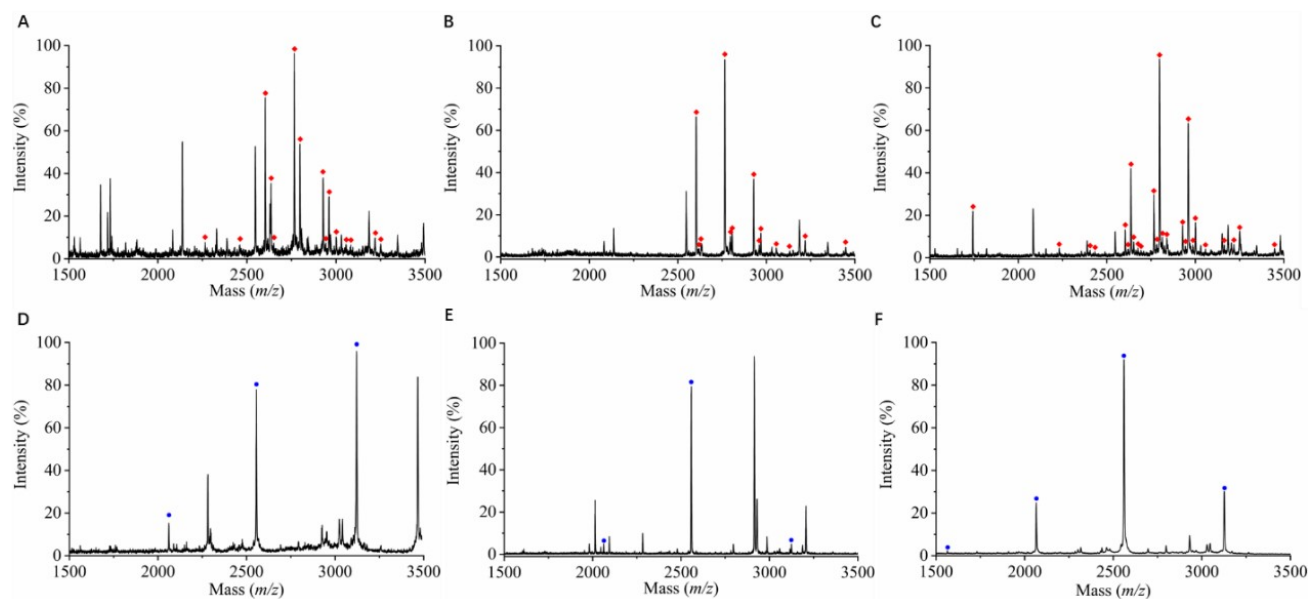

Fig. S6. MALDI-TOF MS analysis of (A-C) IgG digests and (D-F)  $\beta$ -casein digests: (A, D) after enrichment with mFeCD@AG, (B, E) after enrichment with mZrCD@AG and (C, F) after enrichment with mZnCD@AG. “◆” and “●” represent glycopeptides and phosphopeptides.

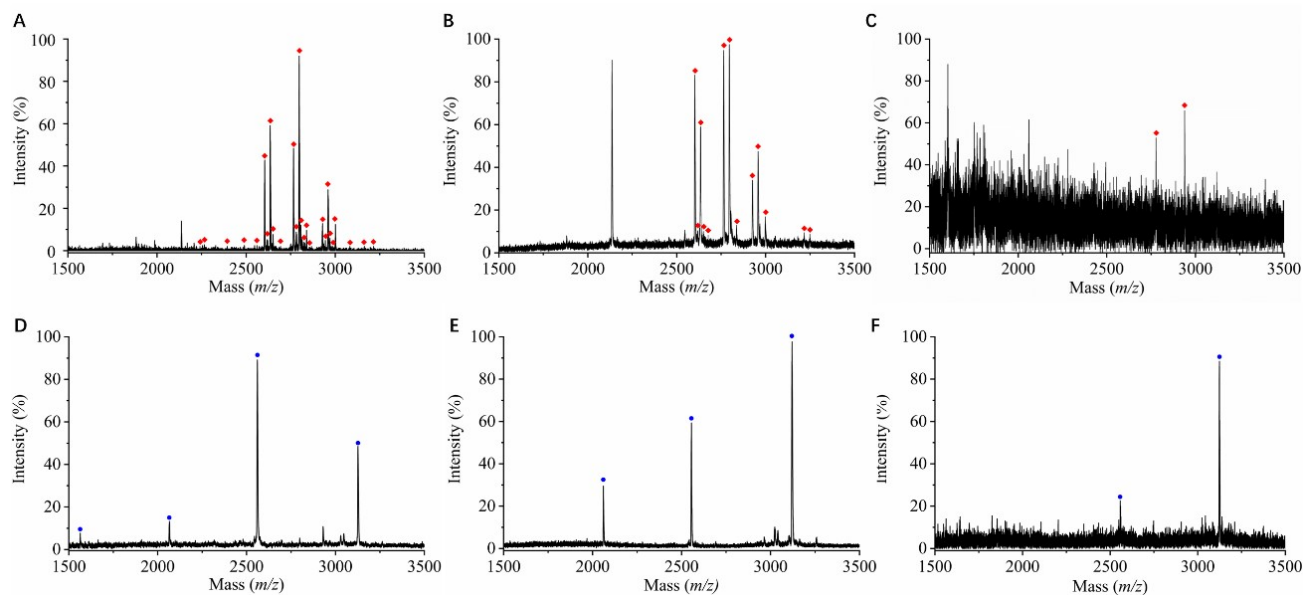

Fig. S7. MALDI-TOF MS analysis of IgG and  $\beta$ -casein with different concentrations after enrichment with mTiCD@AG: (A) 1 fmol IgG, (B) 0.1 fmol IgG, (C) 0.035 fmol IgG; (D) 1 fmol  $\beta$ -casein, (E) 0.1 fmol  $\beta$ -casein and (F) 0.01 fmol  $\beta$ -casein. “◆” and “●” represent glycopeptides and phosphopeptides.



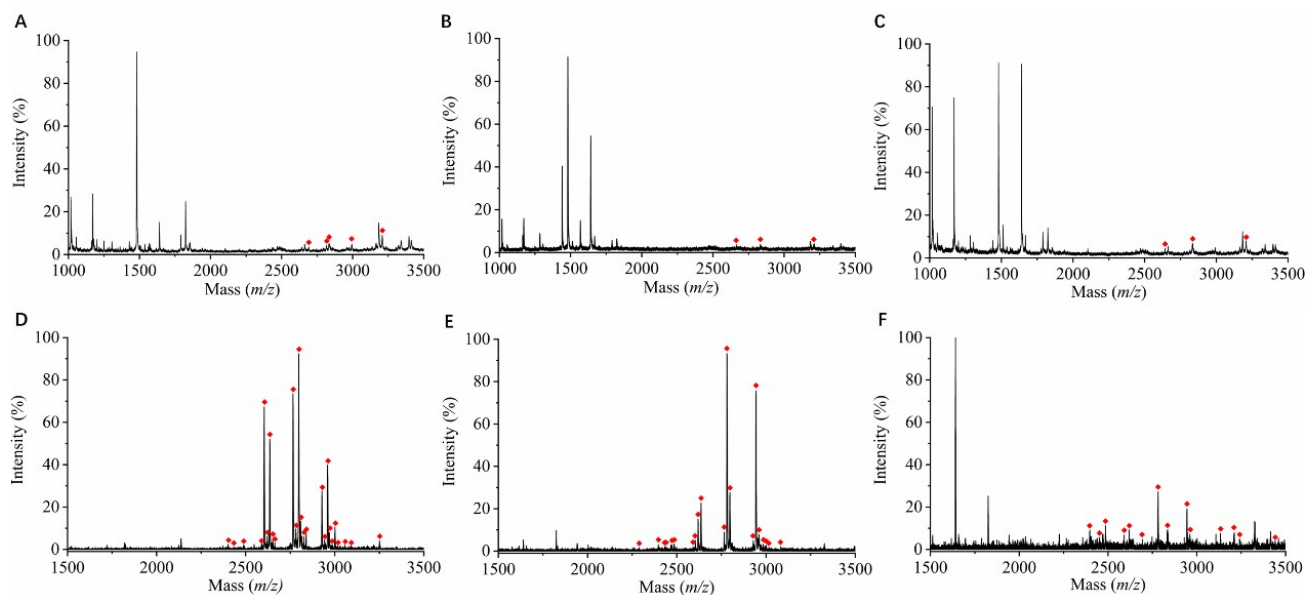

Fig. S8. MALDI-TOF MS analysis of IgG and BSA tryptic digest mixture: (A-C) Before enrichment and (D-F) after enrichment with mTiCD@AG. (A, D) BSA:IgG = 10:1 ( $w/w$ ), (B, E) BSA:IgG = 100:1 ( $w/w$ ) and (C, F) BSA:IgG = 500:1 ( $w/w$ ). “◆” represents glycopeptides.

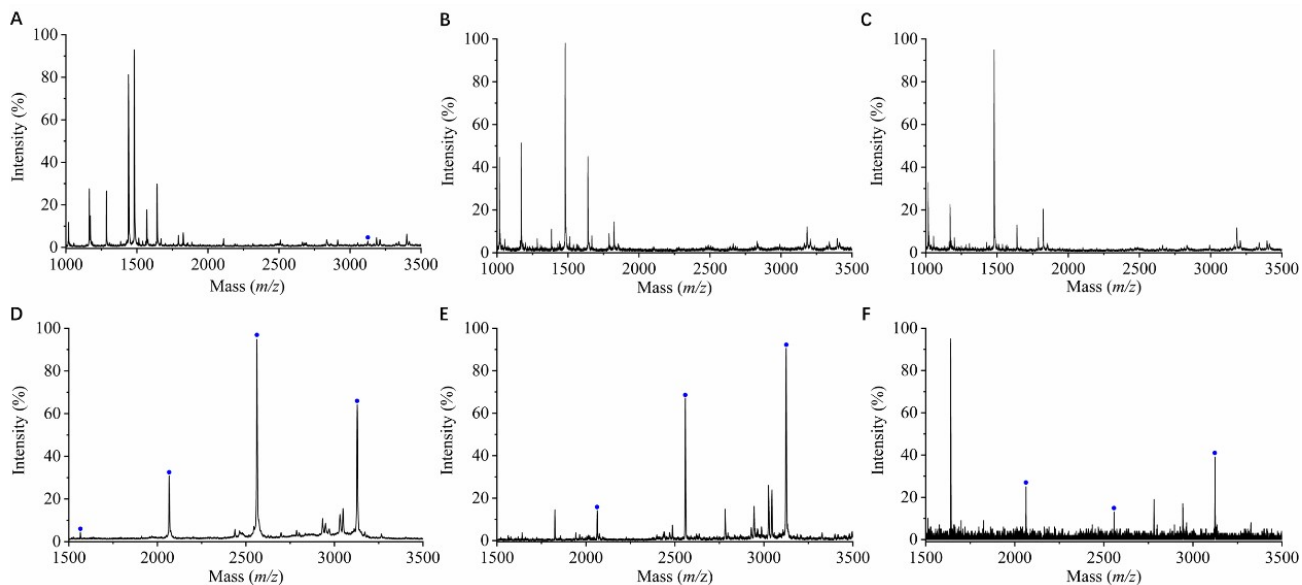

Fig. S9. MALDI-TOF MS analysis of  $\beta$ -casein and BSA tryptic digest mixture: (A-C) before enrichment and (D-F) after enrichment with mTiCD@AG. (A, D) BSA: $\beta$ -casein = 10:1 ( $w/w$ ), (B, E) BSA: $\beta$ -casein = 100:1 ( $w/w$ ) and (C, F) BSA: $\beta$ -casein = 1000:1 ( $w/w$ ). “●” represents phosphopeptides.

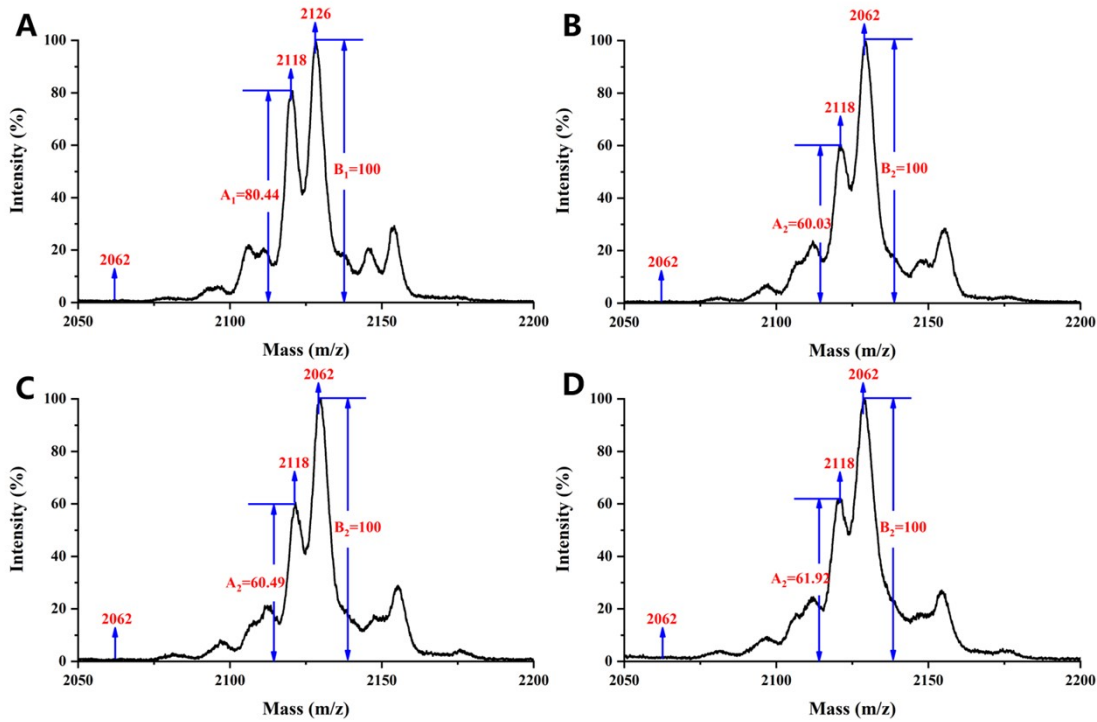

Fig. S10. MALDI-TOF MS analysis of (A) light and intermediate dimethyl labeled standard phosphopeptide before enrichment and (B-D) light dimethyl labeled standard phosphopeptide after enrichment with mTiCD@AG spiked with intermediate dimethyl labeled standard phosphopeptide.

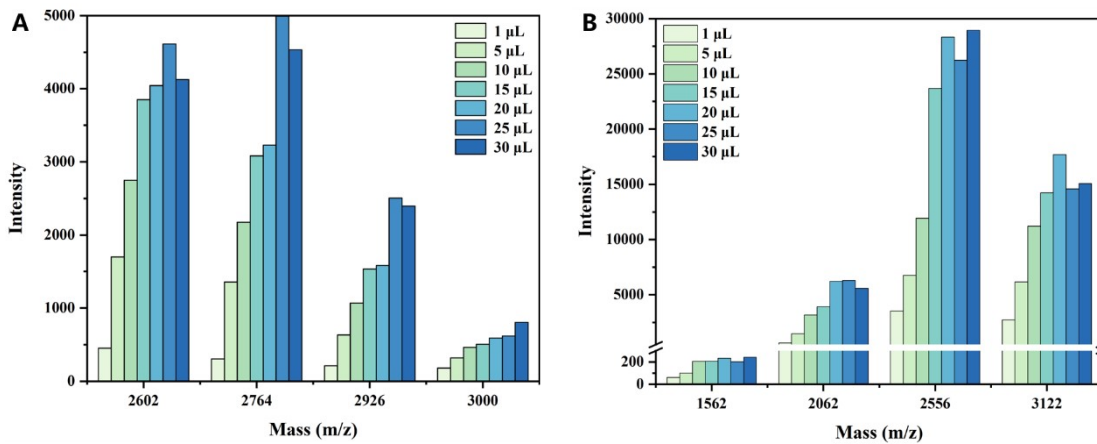

Fig. S11. Evaluation the loading capacity of mTiCD@AG towards (A) glycopeptides and (B) phosphopeptides. The concentration of IgG/ $\beta$ -casein digestion is  $1 \text{ mg mL}^{-1}$ , and the quality of mTiCD@AG is  $0.5 \text{ mg}$ .

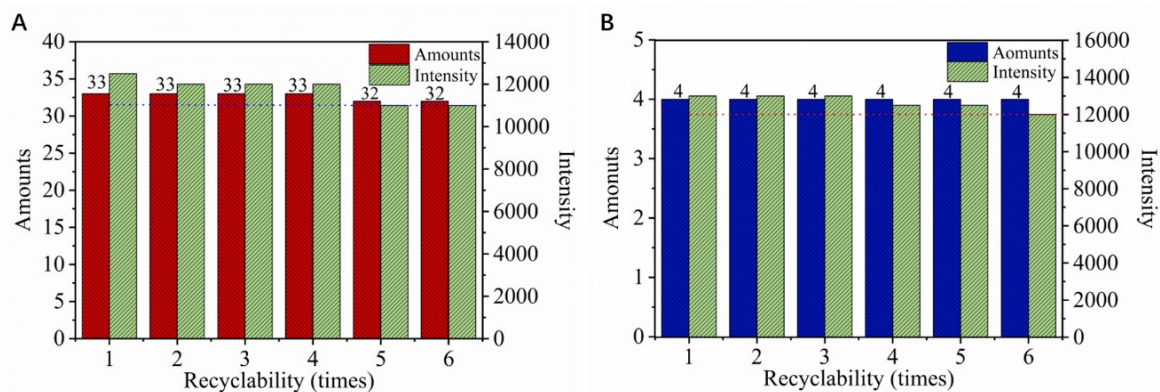

Fig. S12. Reusability of mTiCD@AG under the optimized experimental conditions: (A) IgG and (B)  $\beta$ -casein.

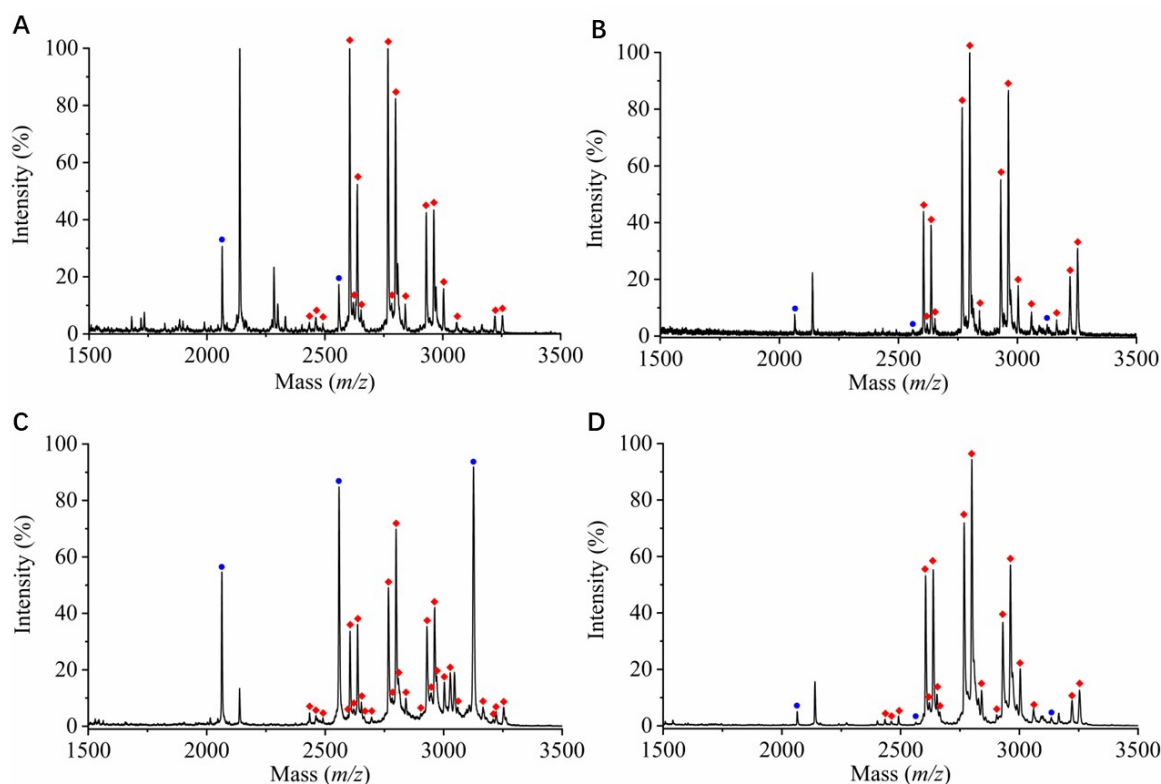

Fig. S13. Enrichment efficiency of 1 pmol IgG and 1 pmol  $\beta$ -casein digests with mTiCD@AG versus loading buffer: (A) ACN/H<sub>2</sub>O/FA (80/17/3, v/v/v), (B) ACN/H<sub>2</sub>O/FA (85/12/3, v/v/v), (C) ACN/H<sub>2</sub>O/FA (90/7/3, v/v/v) and (D) ACN/H<sub>2</sub>O/FA (90/5/5, v/v/v). “◆” and “●” represent glycopeptides and phosphopeptides.

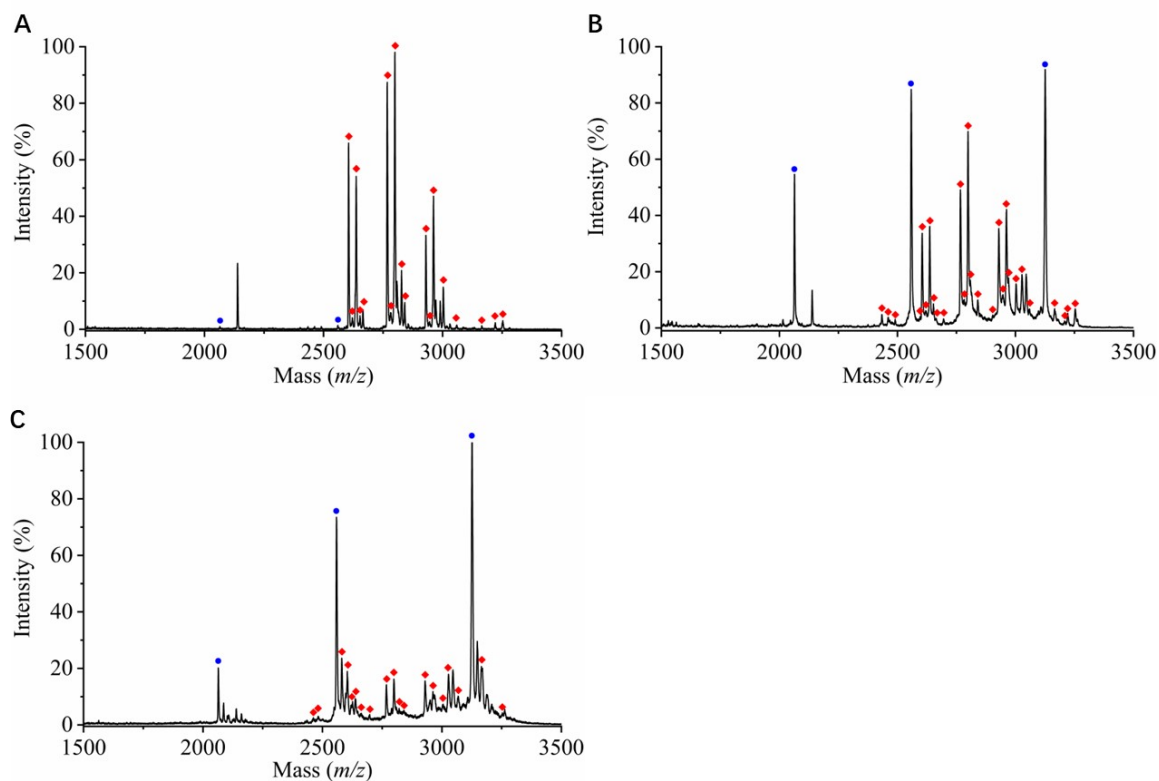

Fig. S14. Enrichment efficiency of 1 pmol IgG and 1 pmol  $\beta$ -casein digests with mTiCD@AG versus elution: (A) 1%  $\text{NH}_3\cdot\text{H}_2\text{O}$ , (B) 3%  $\text{NH}_3\cdot\text{H}_2\text{O}$  and (C) 5%  $\text{NH}_3\cdot\text{H}_2\text{O}$ . “◆” and “●” represent glycopeptides and phosphopeptides.

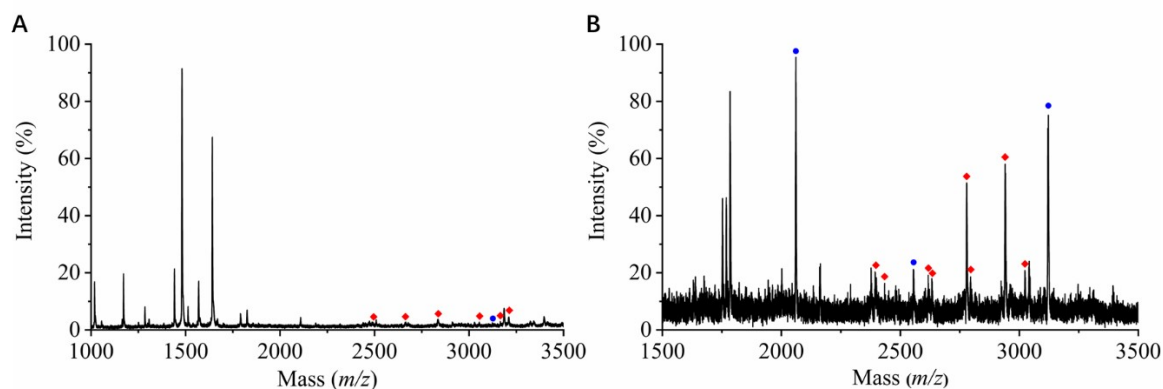

Fig. S15. MALDI-TOF MS analysis of BSA, IgG, and  $\beta$ -casein tryptic digest mixture at BSA:IgG: $\beta$ -casein = 500:1:1 (w/w/w): (A) Before enrichment and (B) after enrichment with mTiCD@AG. “◆” and “●” represent glycopeptides and phosphopeptides.

Table S1. Detailed information of the detected glycopeptides and phosphopeptides from IgG and  $\beta$ -casein tryptic digests after enrichment with mTiCD@AG (N#: glycosylation site; s: phosphorylated site.)

| No.             | Observed <i>m/z</i> | Glycan composition            | Peptide sequence                      |
|-----------------|---------------------|-------------------------------|---------------------------------------|
| I <sub>1</sub>  | 1740.9              | [HexNAc]2[Fuc]1               | EEQYN#STYR                            |
| I <sub>2</sub>  | 2400.5              | [Hex]3[HexNAc]3[Fuc]1         | EEQFN#STFR                            |
| I <sub>3</sub>  | 2430.8              | [Hex]3[HexNAc]3[Fuc]1         | EEQYN#STYR                            |
| I <sub>4</sub>  | 2488.7              | [Hex]3[HexNAc]4XylMan3GlcNAc2 | EEQYN#STYR                            |
| I <sub>5</sub>  | 2561.9              | [Hex]4[HexNAc]3[Fuc]1         | EEQFN#STFR                            |
| I <sub>6</sub>  | 2595                | [Hex]4[HexNAc]3[Fuc]1         | EEQYN#STYR                            |
| I <sub>7</sub>  | 2602.3              | [Hex]4[HexNAc]4[Fuc]1         | EEQFN#STFR                            |
| I <sub>8</sub>  | 2618.7              | [Hex]4[HexNAc]4[Fuc]1         | EEQFN#STYR                            |
| I <sub>9</sub>  | 2634.7              | [Hex]4[HexNAc]4[Fuc]1         | EEQYN#STYR                            |
| I <sub>10</sub> | 2650.7              | [Hex]4[HexNAc]4               | EEQYN#STYR                            |
| I <sub>11</sub> | 2691.4              | [Hex]3[HexNAc]5               | EEQYN#STYR                            |
| I <sub>12</sub> | 2764.8              | [Hex]4[HexNAc]4[Fuc]1         | EEQFN#STFR                            |
| I <sub>13</sub> | 2780.2              | [Hex]5[HexNAc]4               | EEQFN#STFR                            |
| I <sub>14</sub> | 2795.9              | [Hex]4[HexNAc]4[Fuc]1         | EEQYN#STYR                            |
| I <sub>15</sub> | 2805.8              | [Hex]3[HexNAc]5[Fuc]1         | EEQFN#STFR                            |
| I <sub>16</sub> | 2812.2              | [Hex]5[HexNAc]4               | EEQYN#STYR                            |
| I <sub>17</sub> | 2822.3              | [Hex]4[HexNAc]5               | EEQFN#STFR                            |
| I <sub>18</sub> | 2837.3              | [Hex]3[HexNAc]5[Fuc]1         | EEQYN#STYR                            |
| I <sub>19</sub> | 2853.8              | [Hex]4[HexNAc]5               | EEQYN#STYR                            |
| I <sub>20</sub> | 2908.9              | [Hex]4[HexNAc]4[NeuAc]1       | EEQFN#STFR                            |
| I <sub>21</sub> | 2926.8              | [Hex]5[HexNAc]4[Fuc]1         | EEQFN#STFR                            |
| I <sub>22</sub> | 2943.1              | [Hex]5[HexNAc]4[Fuc]1         | EEQFN#STYR                            |
| I <sub>23</sub> | 2958.8              | [Hex]5[HexNAc]4[Fuc]1         | EEQYN#STYR                            |
| I <sub>24</sub> | 2967.5              | [Hex]4[HexNAc]5[Fuc]1         | EEQFN#STFR                            |
| I <sub>25</sub> | 2983.8              | [Hex]5[HexNAc]5               | EEQFN#STFR                            |
| I <sub>26</sub> | 3000.3              | [Hex]4[HexNAc]5[Fuc]1         | EEQYN#STYR                            |
| I <sub>27</sub> | 3057.1              | [Hex]4[HexNAc]4[Fuc]1[NeuAc]1 | EEQFN#STFR                            |
| I <sub>28</sub> | 3086.5              | [Hex]4[HexNAc]4[Fuc]1[NeuAc]1 | EEQYN#STYR                            |
| I <sub>29</sub> | 3130.9              | [Hex]5[HexNAc]5[Fuc]1         | EEQFN#STFR                            |
| I <sub>30</sub> | 3161.8              | [Hex]5[HexNAc]5[Fuc]1         | EEQYN#STYR                            |
| I <sub>31</sub> | 3218.7              | [Hex]5[HexNAc]4[Fuc]1[NeuAc]1 | EEQFN#STFR                            |
| I <sub>32</sub> | 3252.1              | [Hex]5[HexNAc]4[Fuc]1[NeuAc]1 | EEQYN#STYR                            |
| I <sub>33</sub> | 3280.1              | [Hex]4[HexNAc]4[Fuc]1         | TKPYEEQYN#STYR                        |
| No.             | Observed <i>m/z</i> | Phosphoryl groups             | Peptide sequence                      |
| $\beta_1$       | 1562.3              | 4                             | RELEELNVPGEIVESL <sub>ss</sub> EEsITR |
| $\beta_2$       | 2061.9              | 1                             | FQsEEQQQTEDELQDK                      |
| $\beta_3$       | 2556.9              | 1                             | FQsEEQQQTEDELQDKIHPP                  |
| $\beta_4$       | 3122.5              | 4                             | RELEELNVPGEIVEsL <sub>ss</sub> EESITR |

HeNAc = N-acetylglucosamine, Hex = mannose, Fuc = fucose, Xyl = xylose.

Table S2. Comparison of the detection limit of glycopeptides based on different materials

| <b>Material</b>                                              | <b>Detection method</b> | <b>LOD (fmol)</b> | <b>Ref.</b> |
|--------------------------------------------------------------|-------------------------|-------------------|-------------|
| MoS <sub>2</sub> -Fe <sub>3</sub> O <sub>4</sub> -Au/NWs-GSH | MALDI-TOF-MS            | 0.5               | 3           |
| PEIZIF-8@Au@GSH                                              | MALDI-TOF-MS            | 2.0               | 4           |
| CS@PGMA@IDA-Ti <sup>4+</sup>                                 | MALDI-TOF-MS            | 0.1               | 5           |
| Mag-MSMs@PEI-PA-Ti <sup>4+</sup>                             | MALDI-TOF-MS            | 0.5               | 6           |
| MCDC                                                         | MALDI-TOF-MS            | 0.05              | 7           |
| mTiCD@AG                                                     | MALDI-TOF-MS            | 0.035             | This work   |

Table S3. Comparison of the detection limit of phosphopeptides based on different materials

| <b>Material</b>                                           | <b>Detection method</b> | <b>LOD (fmol)</b> | <b>Ref.</b> |
|-----------------------------------------------------------|-------------------------|-------------------|-------------|
| CS@PGMA@IDA-Ti <sup>4+</sup>                              | MALDI-TOF-MS            | 0.1               | 5           |
| Mag-MSMs@PEI-PA-Ti <sup>4+</sup>                          | MALDI-TOF-MS            | 0.2               | 6           |
| TA-Ti-PA@Fe <sub>3</sub> O <sub>4</sub>                   | MALDI-TOF-MS            | 4.0               | 8           |
| Fe <sub>3</sub> O <sub>4</sub> @TiTA                      | MALDI-TOF-MS            | 0.5               | 9           |
| Fe <sub>3</sub> O <sub>4</sub> @TAPTDHTA-Ti <sup>4+</sup> | MALDI-TOF-MS            | 0.05              | 10          |
| mTiCD@AG                                                  | MALDI-TOF-MS            | 0.01              | This work   |

Table S4. List of glycopeptides and phosphopeptides enriched with mTiCD@AG from human serum (N#: glycosylation site, s: phosphorylated site.)

| Glycosyl   | Observed <i>m/z</i> | Sequence                        |
|------------|---------------------|---------------------------------|
| 1          | 1582.76             | WFSAGLASN#SSWLR                 |
| 2          | 1642.61             | N#ccNTENPPGcYR                  |
| 3          | 1656.80             | TKPREEQFN#STYR                  |
| 4          | 1690.79             | ERSWPAVGN#cSSALR                |
| 5          | 1775.82             | FSDGLESN#SSTQFEVK               |
| 6          | 1853.76             | N#GTGHGN#STHHGPEYMR             |
| 7          | 1884.03             | LHINHNN#LTESVGPLPK              |
| 8          | 1903.89             | FSDGLESN#SSTQFEVKK              |
| 9          | 2022.99             | ELHHLQEQN#VSN AFLDK             |
| 10         | 2041.94             | LSDLSIN#STEcLHVHcR              |
| 11         | 2149.16             | IIVPLNNREN#ISDPTSPLR            |
| 12         | 2161.15             | VVGVPYQGN#ATALFILPSEGK          |
| 13         | 2180.12             | AGAFLGLTnVAVMN#LSGNcLR          |
| 14         | 2205.10             | DVQIIVFPEDGIHGfN#FTR            |
| 15         | 2214.04             | TLN#QSSDELQLSMGNAMFVK           |
| 16         | 2273.14             | TVLTPATnHmGN#VTFTIPANR          |
| 17         | 2345.17             | SQILEGLGFN#LTELSESDVHR          |
| 18         | 2356.05             | GLTFQQN#ASSmcVPDQDAIR           |
| 19         | 2398.22             | GcVLLSYLN#ETVTVSASLESVR         |
| 20         | 2452.21             | ALGISPFHEHAEVVFTAN#DSGPR        |
| 21         | 2536.26             | VYIHPFHLVIHN#ESTcEQLAK          |
| 22         | 2601.05             | EEQFN#STFR                      |
| 23         | 2618.37             | AELSN#HTRPVILVPGcLGnQLEAK       |
| 24         | 2635.47             | QLVEIEKVVLHPN#YSQVDIGLIK        |
| 25         | 2763.20             | EEQFN#STFR                      |
| 26         | 2795.02             | EEQYN#STYR                      |
| 27         | 2842.05             | FVEGSHN#STVSLTTK                |
| 28         | 2925.02             | YVN#MSN#HHR                     |
| 29         | 2957.10             | EEQYN#STYR                      |
| 30         | 2998.06             | EEQYN#STYR                      |
| 31         | 3040.00             | FVEGSHN#STVSLTTK                |
| 32         | 3051.55             | N#LSSLESVQLDHnQLETLPGDVFGALPR   |
| 33         | 3216.10             | YVNMSN#HHR                      |
| 34         | 3373.63             | FSLLGHASIScTVEN#ETIGVWRPSPPTcEK |
| Phosphoryl | Observed <i>m/z</i> | Sequence                        |
| 1          | 1388.25             | DsGEGDFLAEGGGV                  |
| 2          | 1465.70             | DsGEGDFLAEGGGVR                 |
| 3          | 1616.84             | ADsGEGDFLAEGGGVR                |



Table S5. List of glycopeptides and phosphopeptides enriched with mTiCD@AG from Hela cell lysate (n: glycosylation site, #: phosphorylated site, \*: oxidized site.)

| Glycosyl   | Protein ID | Peptides Sequence        |
|------------|------------|--------------------------|
| 1          | H0YA55     | K.KVPQVSTPTLVEVSR.n      |
| 2          | H0YA55     | K.VPQVSTPTLVEVSR.n       |
| 3          | P0DOX7     | K.VDNALQSGnSQESVTEQDSK.D |
| 4          | Q8TCD0     | K.VDNALQSGnSQESVTEQDSK.D |
| 5          | Q96E61     | K.AnPTVTLFPPSSEELQANK.A  |
| 6          | A6XGL3     | K.TLnNDIM*LIK.L          |
| 7          | A6XGL3     | K.TLnNDIMLIK.L           |
| 8          | Q6PJF2     | K.VDNALQSGnSQESVTEQDSK.D |
| 9          | A0A5C2G1F5 | R.LLIYDASnR.T            |
| 10         | A0A5C2G2T3 | R.LLIYDASnR.T            |
| 11         | A0A5C2G8I7 | R.LLIYDASnR.T            |
| 12         | A0A5C2GJH3 | R.LLIYDASnR.T            |
| 13         | S6AWF4     | R.LLIYDASnR.T            |
| 14         | O60287     | K.nITKT#QK.V             |
| 15         | P08254     | R.IVnY#TPDLPK.D          |
| 16         | P48547     | R.nGTQVR.Y               |
| 17         | Q14593     | R.SSnLTR.H               |
| 18         | Q8TBG4     | K.EnPS#R.K               |
| 19         | Q8WYK1     | K.nGSLQVR.Y              |
| 20         | Q96EN8     | R.QLnTSDENGK.E           |
| 21         | A0A0A0MRU9 | K.KFLILnPS#K.R           |
| 22         | A0A0A0MSW0 | R.TM*QLnLSR.S            |
| 23         | A0A5C2GU23 | R.VTISCSGnSSNIGR.N       |
| 24         | A0A7P0MW50 | R.NnNTDLMILK.N           |
| 25         | B3KXA5     | K.ENNLKNVEELnK.S         |
| 26         | B4DVG9     | K.KDnLTAVEK.W            |
| 27         | B7ZM71     | K.T#GnLAQTR.A            |
| 28         | C9J9V9     | K.EnDTLKALLK.A           |
| 29         | D6RGX6     | R.AnMSQVR.Q              |
| 30         | H0Y5D0     | -.X#CFLEnK.S             |
| 31         | H0YL13     | -.XAKTInK.V              |
| 32         | J3QLS5     | -.XSWnPR.L               |
| 33         | Q7Z4E0     | K.STnIIS#TIK.Y           |
| 34         | Q86YK2     | -.M*DIRPnHTIYINNMNDKIK.K |
| 35         | Q9ULR4     | K.QFnKS#GDLSM*nLLR.H     |
| 36         | H0YA55     | K.KVPQVSTPTLVEVSR.n      |
| Phosphoryl | Protein ID | Peptides Sequence        |
| 1          | P02765     | K.CDSSPDS#AEDVRK.V       |



|    |            |                             |
|----|------------|-----------------------------|
| 2  | Q8IYH3     | R.RCS#GLARR.V               |
| 3  | P42684     | R.GAT#ALPLR.T               |
| 4  | H0Y9X0     | -.XGYLY#K.W                 |
| 5  | H7C063     | R.HS#LGIQVR.G               |
| 6  | Q9Y5I7     | R.KAY#SAAGVSMAS.S           |
| 7  | Q9Y5I7     | R.KAYS#AAGVSMAS.S           |
| 8  | H7BZI1     | R.T#KLDELK.R                |
| 9  | A5YKK6     | K.QLFS#FPIK.H               |
| 10 | A8MTJ3     | K.KDIFQEKVT#K.V             |
| 11 | O15520     | R.KLFSFT#K.Y                |
| 12 | O60287     | K.nITKT#QK.V                |
| 13 | P08254     | R.IVnY#TPDLPK.D             |
| 14 | P17540     | K.HTT#DLASK.I               |
| 15 | Q6N063     | R.QRLGQES#AAR.K             |
| 16 | Q6NSI8     | R.QSSSEKNT#RSK.S            |
| 17 | Q6P4R8     | K.SGPS#TVS#EPAK.S           |
| 18 | Q6ZSJ9     | K.TNPS#K.Y                  |
| 19 | Q7Z695     | K.TEM*AMLVT#QAR.K           |
| 20 | Q8TBG4     | K.EnPS#R.K                  |
| 21 | Q8TCS8     | R.ALT#QLQVR.A               |
| 22 | A0A087WYM2 | K.AGQAKLT#K.S               |
| 23 | A0A0A0MRU9 | K.KFLILnPS#K.R              |
| 24 | A0A0F7WAP3 | R.LCLLRQRT#R.R              |
| 25 | A0A0U1RQX8 | K.QSPKANLRSPDLAAEEIS#R.V    |
| 26 | A0A1S5UZ27 | R.KRY#SVDK.S ! R.KRY#SVDK.T |
| 27 | A0A3B3ITJ0 | -.XQDVVFT#DEM*AHFDR.E       |
| 28 | A0A5F9ZHW6 | R.EY#GRPEVLK.E              |
| 29 | A0A5H1ZRP3 | K.APLLHS#VS#R.D             |
| 30 | A0A8I5QJU2 | K.T#SAAAGSSS#R.K            |
| 31 | A0A8Q3WL55 | K.KMLQT#NLK.V               |
| 32 | A0A8V8TLX3 | R.IDLS#RVPGISK.D            |
| 33 | A0A8V8TMC2 | K.TEDGQAS#QSRYSK.R          |
| 34 | B4DM78     | R.GGKS#PISS#VLK.D           |
| 35 | B7Z8Z8     | K.ARKSVFIT#R.K              |
| 36 | B7ZM71     | K.T#GnLAQTR.A               |
| 37 | F8W883     | R.IYTY#LLEK.S               |
| 38 | F8WEI8     | R.LGSGGTQDGS#DTPLLK.T       |
| 39 | H0Y5D0     | -.X#CFLEnK.S                |
| 40 | H0YAN3     | -.XKT#GHAEVVR.V             |
| 41 | H0YAN9     | R.T#ASGKSK.K                |
| 42 | H0YJG5     | -.XS#SHVK.I                 |
| 43 | H0YMC7     | K.KLESS#VSTGR.K             |
| 44 | H3BMD8     | R.KPS#LVASK.L               |
| 45 | I3L1P8     | R.LT#GADGTPPGFLLK.A         |
| 46 | Q53SN6     | R.IST#EHDPVLK.Q             |

---

|    |        |                      |
|----|--------|----------------------|
| 47 | Q6NWR3 | R.QPS#PVPSFR.V       |
| 48 | Q7Z4E0 | K.STnIIS#TIK.Y       |
| 49 | Q9ULR4 | K.QFnKS#GDLSM*NLLR.H |
| 50 | V9GYS1 | K.VKS#PELQAEAK.S     |

---

---

## References

- 1 P. J. Boersema, R. Raijmakers, S. Lemeer, S. Mohammed and A. J. R. Heck, *Nat. Protoc.*, 2009, **4**, 484-494.
- 2 H. Z. Lin, H. M. Chen, X. Shao and C. H. Deng, *Microchim. Acta*, 2018, **185**, 562.
- 3 H. Q. Zhang, Y. Y. Lv, J. Du, W. Shao, F. L. Jiao, C. S. Xia, F. Y. Gao, Q. Yu, Y. Y. Liu, W. J. Zhang, Y. J. Zhang, W. J. Qin and X. H. Qian, *Anal. Chim. Acta*, 2020, **1098**, 181-189.
- 4 J. N. Wu, X. T. Jin, C. H. Zhu, Y. H. Yan, C. F. Ding and K. Q. Tang, *Talanta*, 2021, **228**, 122263.
- 5 X. J. Zou, J. Z. Jie and B. Yang, *Anal. Chem.*, 2017, **89**, 7520-7526.
- 6 Y. Y. Hong, Q. L. Zhan, Y. Zheng, C. L. Pu, H. L. Zhao and M. B. Lan, *Talanta*, 2019, **197**, 77-85.
- 7 P. Li, Z. Li, D. W. Zhang and Q. Jia, *Chin. Chem. Lett.*, 2023, **34**, 107619.
- 8 K. N. Zhang, Y. Hao, D. H. Hu, S. M. Deng, Y. H. Jin, X. F. Wang, H. L. Liu, Y. Liu and M. X. Xie, *J. Chromatogr. A*, 2021, **1659**, 462648.
- 9 H. M. Chu, H. Y. Zheng, J. Z. Yao, N. R. Sun, G. Q. Yan and C. H. Deng, *Chem. Commun.*, 2020, **56**, 11299-11302.
- 10 Y. T. He, S. S. Zhang, C. Zhong, Y. X. Yang, G. R. Li, Y. Ji and Z. A. Lin, *Talanta*, 2021, **235**, 122789.
